# Supplementary material for: Application of the response surface methodology in the optimization of modified molecularly imprinted polymer based pipette-tip micro-solid phase extraction for spectrophotometric determination of nicotine in seawater and human plasma
Source: Royal Society of Chemistry journal article supplement (doi:10.1039/c9ay01496a), 2019-01-01
Supplement: c9ay01496a1.pdf [file c9ay01496a1.pdf]

**Supplementary data to:**

**Application of response surface methodology in the optimization of modified molecularly imprinted polymer based pipette tip micro solid phase extraction for spectrophotometric determination of nicotine in seawater and human plasma**

Sayyed Hossein Hashemi,\* and Fateme Keykha

Department of Marine Chemistry, Faculty of Marine Science, Chabahar Maritime University, Chabahar, Iran. Email: h\_hashemi\_85@yahoo.com

**Table SII.** Design matrix in the model, observed response and predicted values

| A   | B | C  | D  | Y <sub>observed</sub> | Y <sub>predicted</sub> | Error % |
|-----|---|----|----|-----------------------|------------------------|---------|
| 100 | 3 | 7  | 10 | 0.311                 | 0.296                  | 4.88    |
| 100 | 3 | 7  | 12 | 0.349                 | 0.360                  | -3.07   |
| 100 | 3 | 11 | 10 | 0.369                 | 0.390                  | -5.79   |
| 100 | 3 | 11 | 12 | 0.462                 | 0.441                  | 4.54    |
| 100 | 5 | 9  | 11 | 0.906                 | 0.914                  | -0.84   |
| 100 | 7 | 7  | 10 | 0.328                 | 0.341                  | -3.91   |
| 100 | 7 | 7  | 12 | 0.369                 | 0.383                  | -3.93   |
| 100 | 7 | 11 | 10 | 0.517                 | 0.497                  | 3.94    |
| 100 | 7 | 11 | 12 | 0.535                 | 0.526                  | 1.68    |
| 200 | 3 | 9  | 11 | 0.857                 | 0.859                  | -0.20   |
| 200 | 5 | 7  | 11 | 0.895                 | 0.843                  | 5.81    |
| 200 | 5 | 9  | 10 | 0.899                 | 0.895                  | 0.44    |
| 200 | 5 | 9  | 11 | 1.121                 | 1.083                  | 3.41    |
| 200 | 5 | 9  | 11 | 1.094                 | 1.083                  | 1.02    |
| 200 | 5 | 9  | 11 | 1.074                 | 1.083                  | -0.82   |
| 200 | 5 | 9  | 11 | 1.098                 | 1.083                  | 1.38    |
| 200 | 5 | 9  | 11 | 1.101                 | 1.083                  | 1.65    |
| 200 | 5 | 9  | 11 | 1.005                 | 1.083                  | -7.74   |
| 200 | 5 | 9  | 12 | 0.956                 | 0.959                  | -0.35   |
| 200 | 5 | 11 | 11 | 0.932                 | 0.983                  | -5.51   |
| 200 | 7 | 9  | 11 | 0.941                 | 0.939                  | 0.25    |
| 300 | 3 | 7  | 10 | 0.202                 | 0.199                  | 1.71    |
| 300 | 3 | 7  | 12 | 0.264                 | 0.298                  | -12.77  |
| 300 | 3 | 11 | 10 | 0.338                 | 0.337                  | 0.34    |
| 300 | 3 | 11 | 12 | 0.448                 | 0.423                  | 5.63    |
| 300 | 5 | 9  | 11 | 0.879                 | 0.871                  | 0.94    |
| 300 | 7 | 7  | 10 | 0.239                 | 0.273                  | -14.35  |
| 300 | 7 | 7  | 12 | 0.385                 | 0.351                  | 8.77    |
| 300 | 7 | 11 | 10 | 0.496                 | 0.473                  | 4.67    |
| 300 | 7 | 11 | 12 | 0.509                 | 0.538                  | -5.60   |

**Table SI2.** Summary of analysis of variance (ANOVA) for extraction of nicotine

| Source                   | Sum of Squares | df | Mean Square | F Value | p-value<br>Prob > F | % PC= (SS/ $\sum$ SS) $\times$ 100 |
|--------------------------|----------------|----|-------------|---------|---------------------|------------------------------------|
| Model                    | 2.95           | 14 | 0.21        | 147.90  | < 0.0001            |                                    |
| A- Eluent solvent volume | 0.0083         | 1  | 0.0083      | 5.81    | 0.03                | 1.77                               |
| B-Extraction cycles      | 0.029          | 1  | 0.03        | 20.18   | 0.0004              | 6.17                               |
| C-Elution Cycles         | 0.089          | 1  | 0.09        | 62.35   | < 0.0001            | 18.94                              |
| D-PH                     | 0.019          | 1  | 0.02        | 13.04   | 0.0026              | 4.04                               |
| AB                       | 0.00088        | 1  | 0.00088     | 0.62    | 0.44                | 0.19                               |
| AC                       | 0.0019         | 1  | 0.0019      | 1.34    | 0.26                | 0.40                               |
| AD                       | 0.0012         | 1  | 0.0012      | 0.87    | 0.36                | 0.25                               |
| BC                       | 0.0037         | 1  | 0.0037      | 2.63    | 0.12                | 0.79                               |
| BD                       | 0.00045        | 1  | 0.00045     | 0.32    | 0.58                | 0.10                               |
| CD                       | 0.00018        | 1  | 0.00018     | 0.12    | 0.73                | 0.04                               |
| A <sup>2</sup>           | 0.094          | 1  | 0.094       | 66.14   | < 0.0001            | 20                                 |
| B <sup>2</sup>           | 0.088          | 1  | 0.088       | 61.71   | < 0.0001            | 18.72                              |
| C <sup>2</sup>           | 0.07           | 1  | 0.074       | 52.37   | < 0.0001            | 14.89                              |
| D <sup>2</sup>           | 0.063          | 1  | 0.06        | 44.08   | < 0.0001            | 13.40                              |
| Residual                 | 0.02           | 15 | 0.0014      |         |                     |                                    |
| Lack of Fit              | 0.01           | 10 | 0.0013      | 0.79    | 0.65                |                                    |
| Pure Error               | 0.0083         | 5  | 0.0016      |         |                     |                                    |
| Cor Total                | 2.97           | 29 |             |         |                     |                                    |

PC %: Percent contribution, SS: Sum of squares
